# Supplementary material for: Investigating the response of LAI to droughts in southern African vegetation using observations and model-simulations
Source: Copernicus journal article supplement (doi:10.5194/hess-2020-528), 2020-11-27
Supplement: Supplementary file 1 [file hess-2020-528-supplement.pdf]

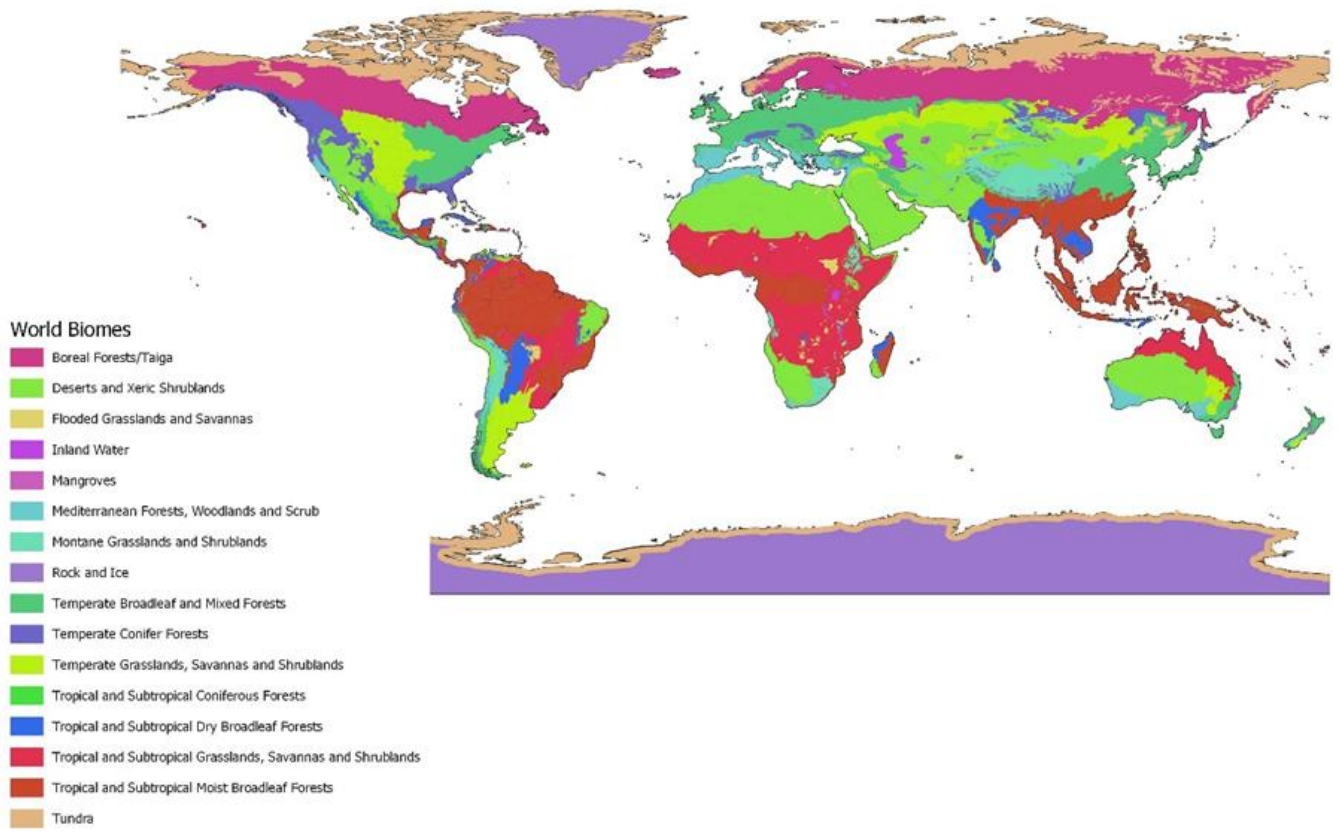

47  
48  
49  
50  
51  
52  
53  
54  
55  
56  
57  
58  
59  
60  
61  
62  
63  
64  
65  
66  
67

Figure S1. Major global vegetation biomes

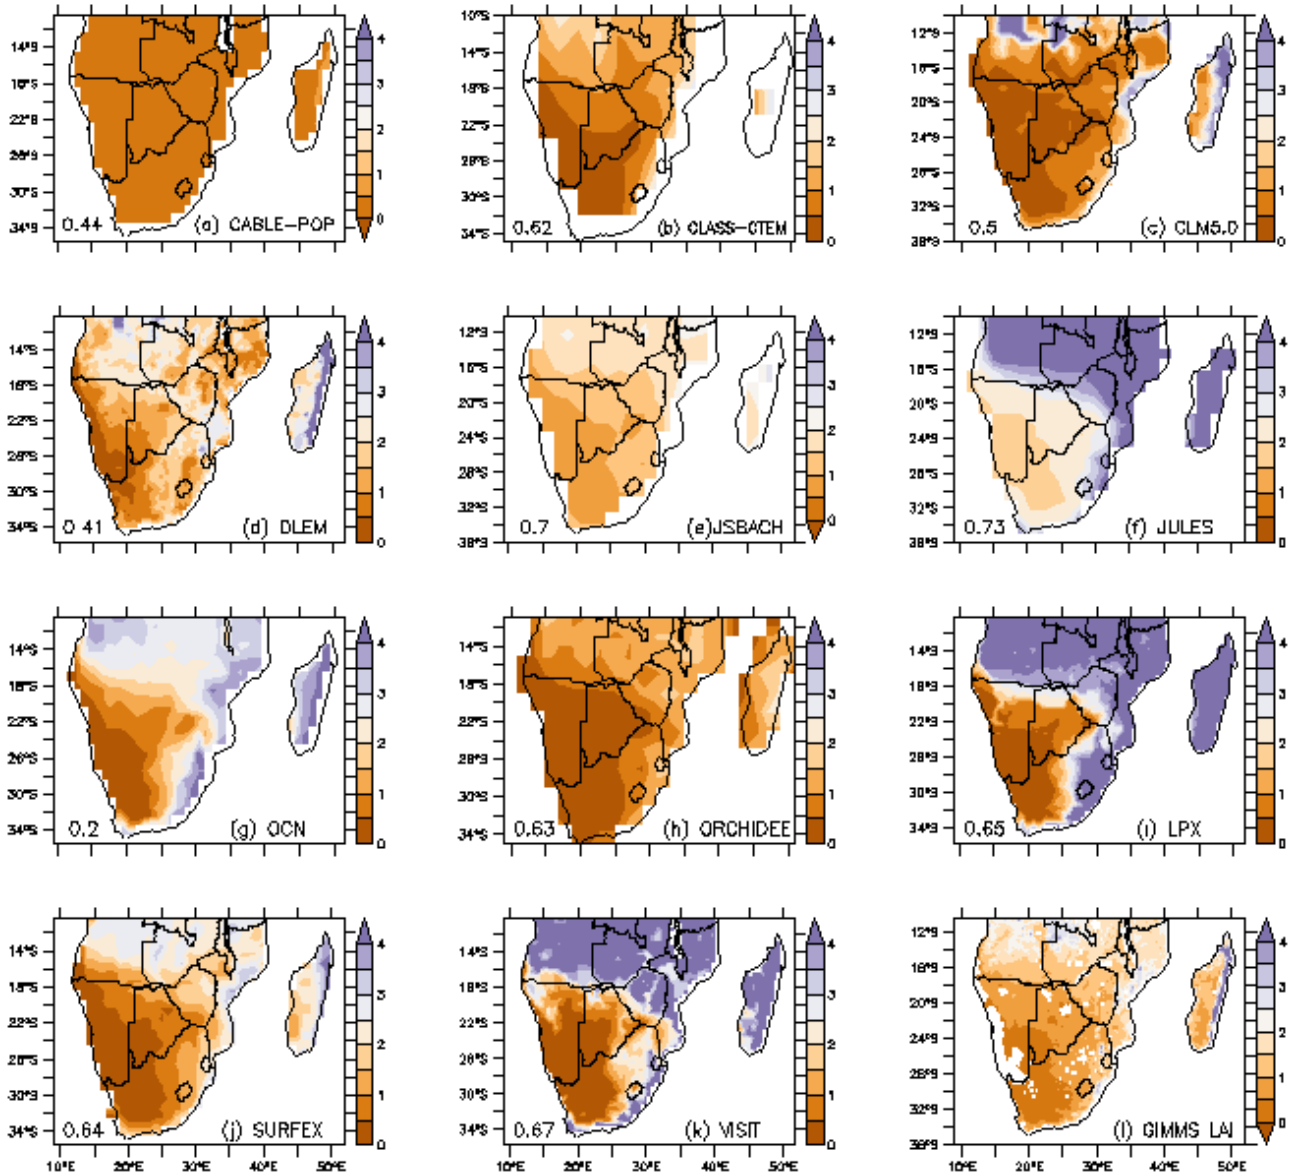

68

69 Figure S2. Spatial distribution of observed and simulated LAI over southern Africa; for the  
 70 period 1982 – 2011. The spatial correlation values between models and GIMMS are indicated  
 71 inside the panels.

72

73

74

75

76

77

78

79

80

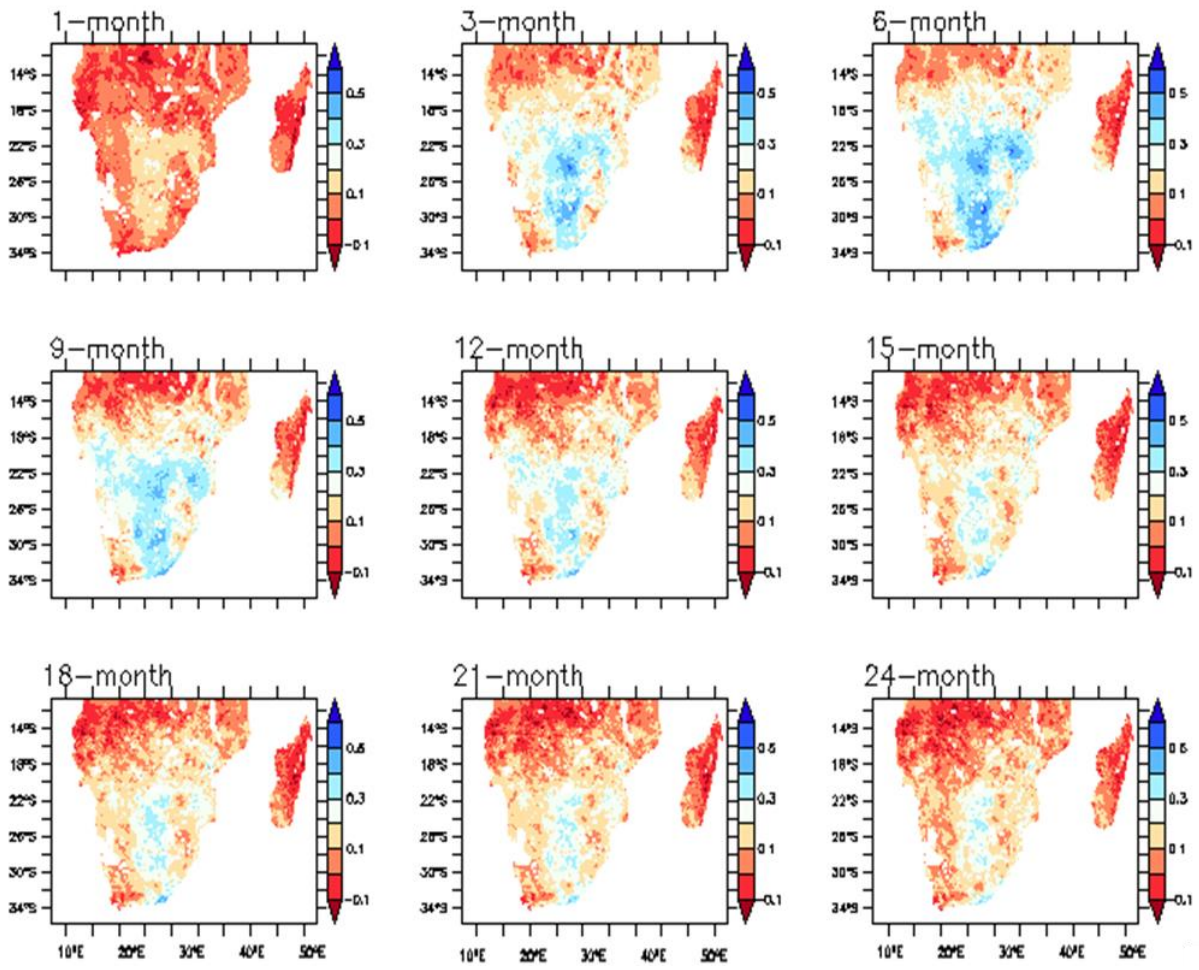

81

82 Figure S3. Spatial distribution of observed correlations at 1- to 24-month timescales over  
83 southern Africa for the period 1982 – 2011.

84

85

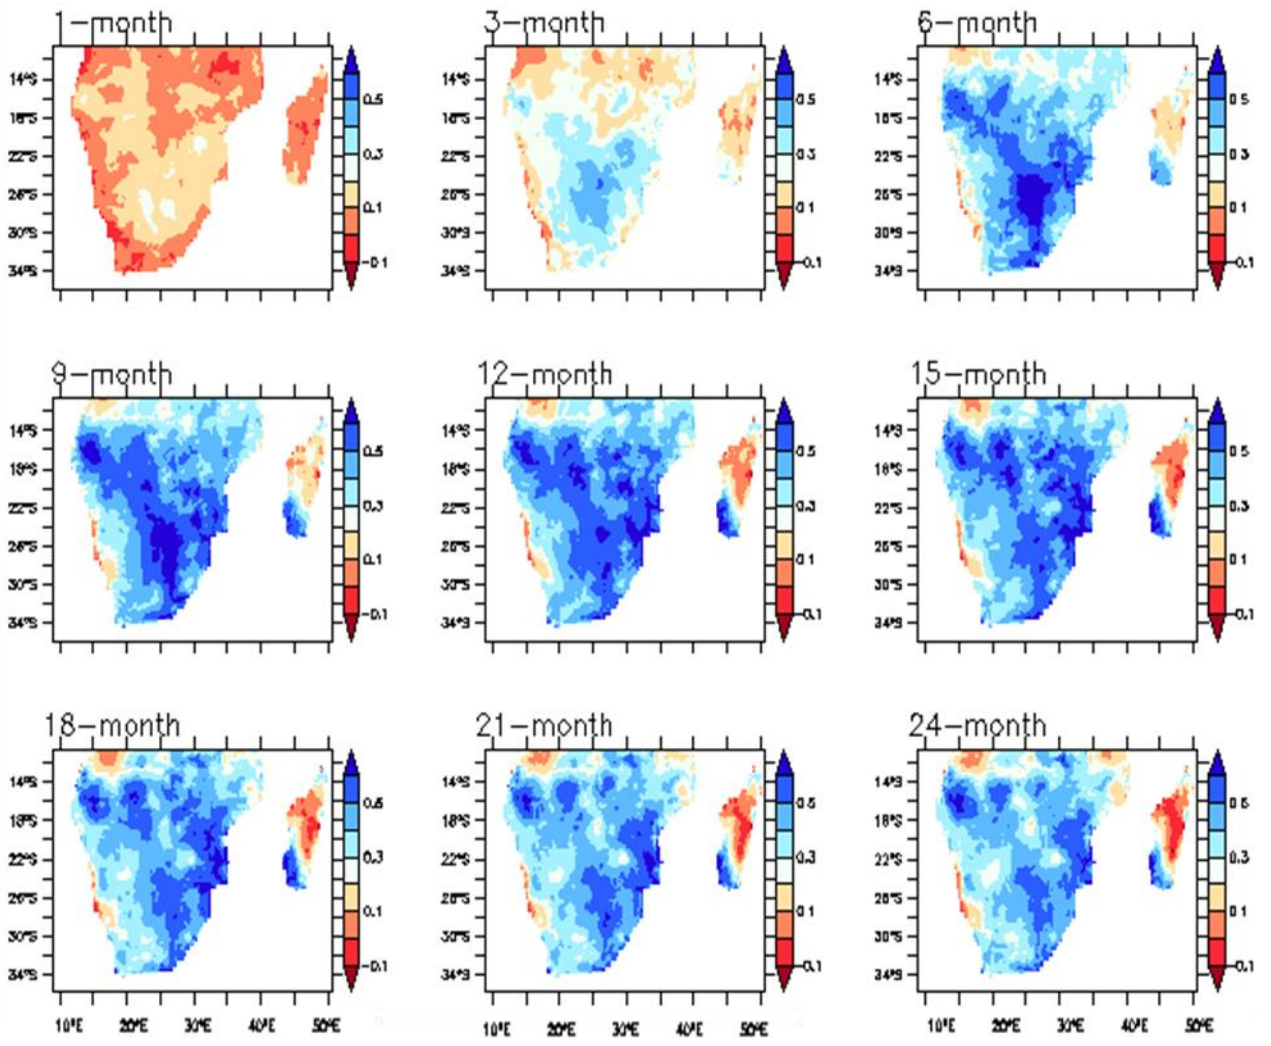

86

87

Figure S4. As in Fig. S3 but for the model ensemble median

88

89

90

91

92

93

94

95

96

97

98

99



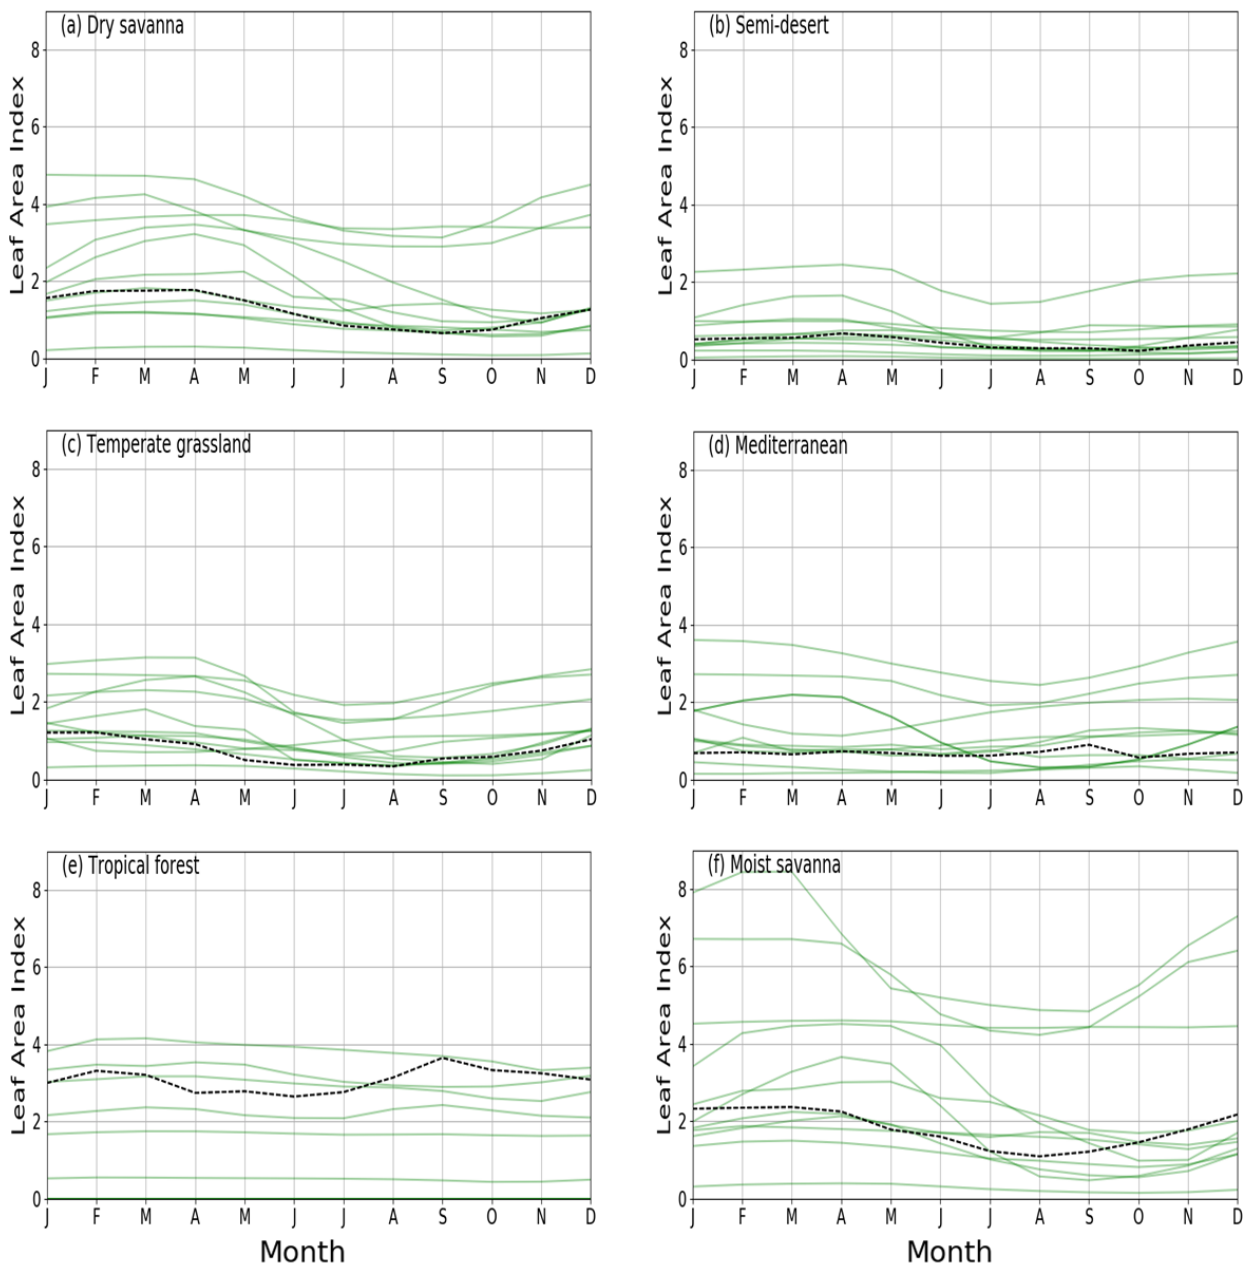

102 Figure S5. Annual cycle of LAI for observation and models (TRENDY) across six biomes over  
 103 southern Africa for the period 1982 – 2011. The dash black line is observation while single  
 104 light green lines represent each different models.

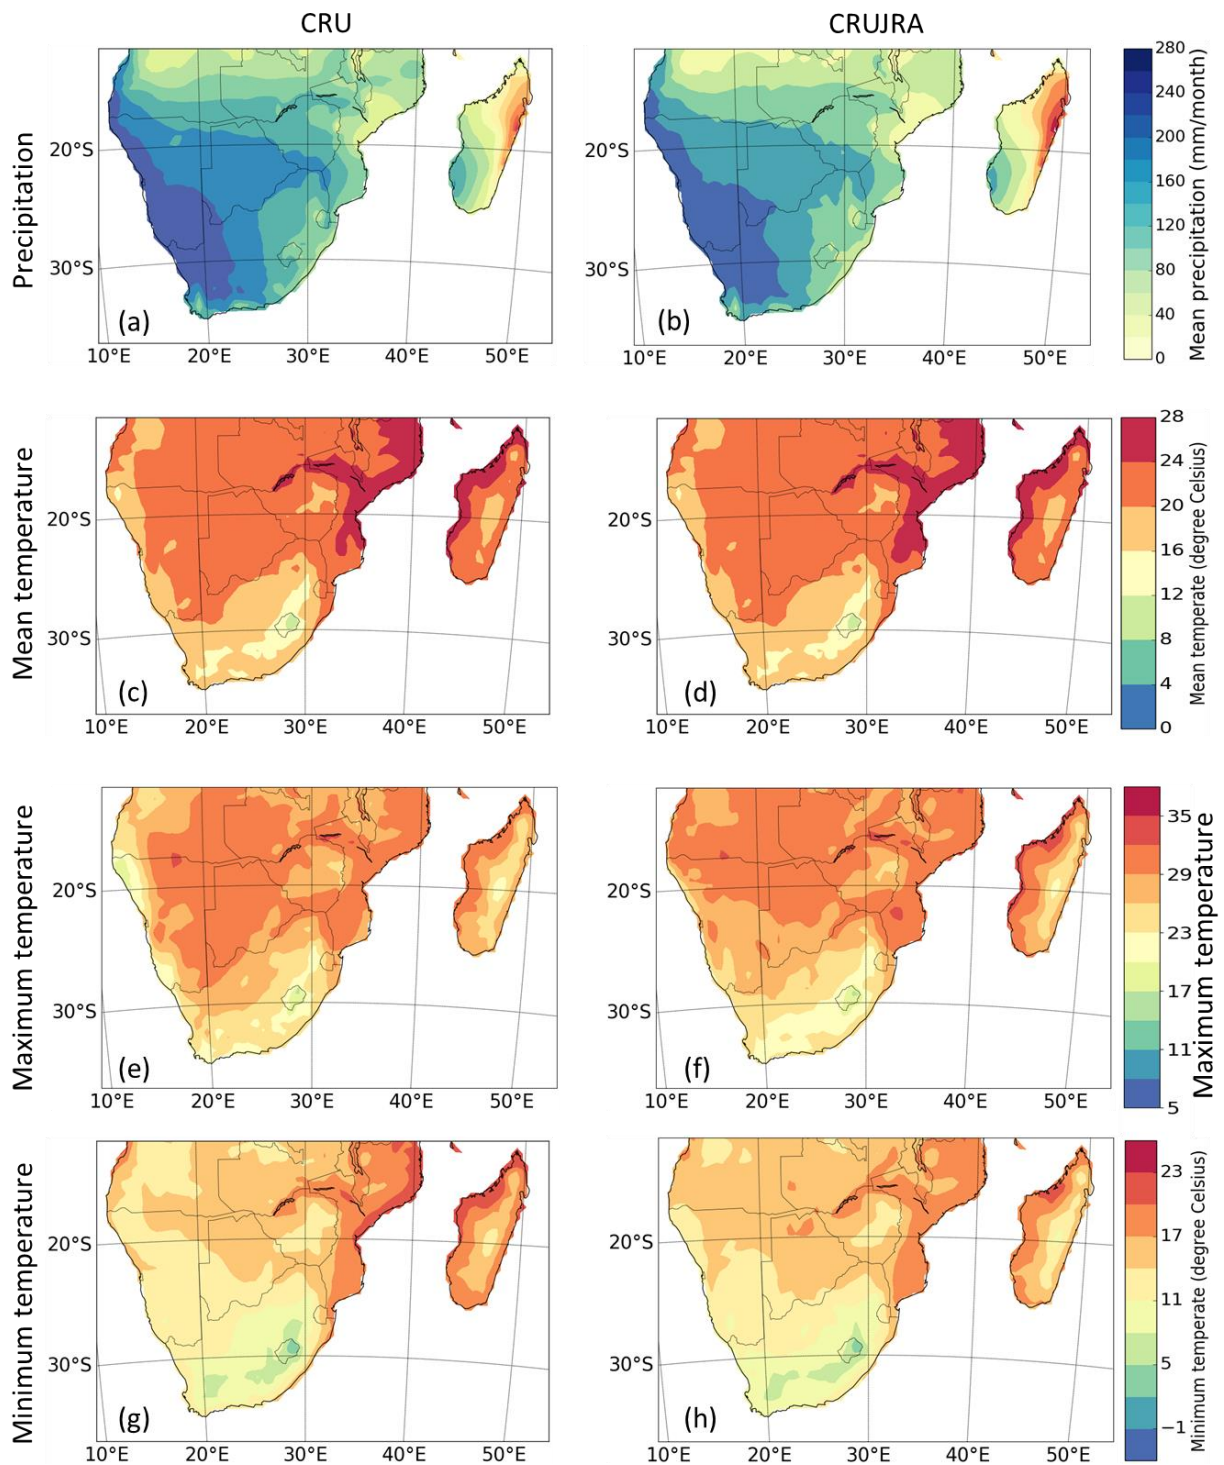

111

112 Figure S6. Spatial distribution of precipitation, mean temperature, maximum temperature and  
 113 minimum temperature over southern Africa in CRU and CRUJRA; for the periods 1982 –  
 114 2011.

115

116

117

118

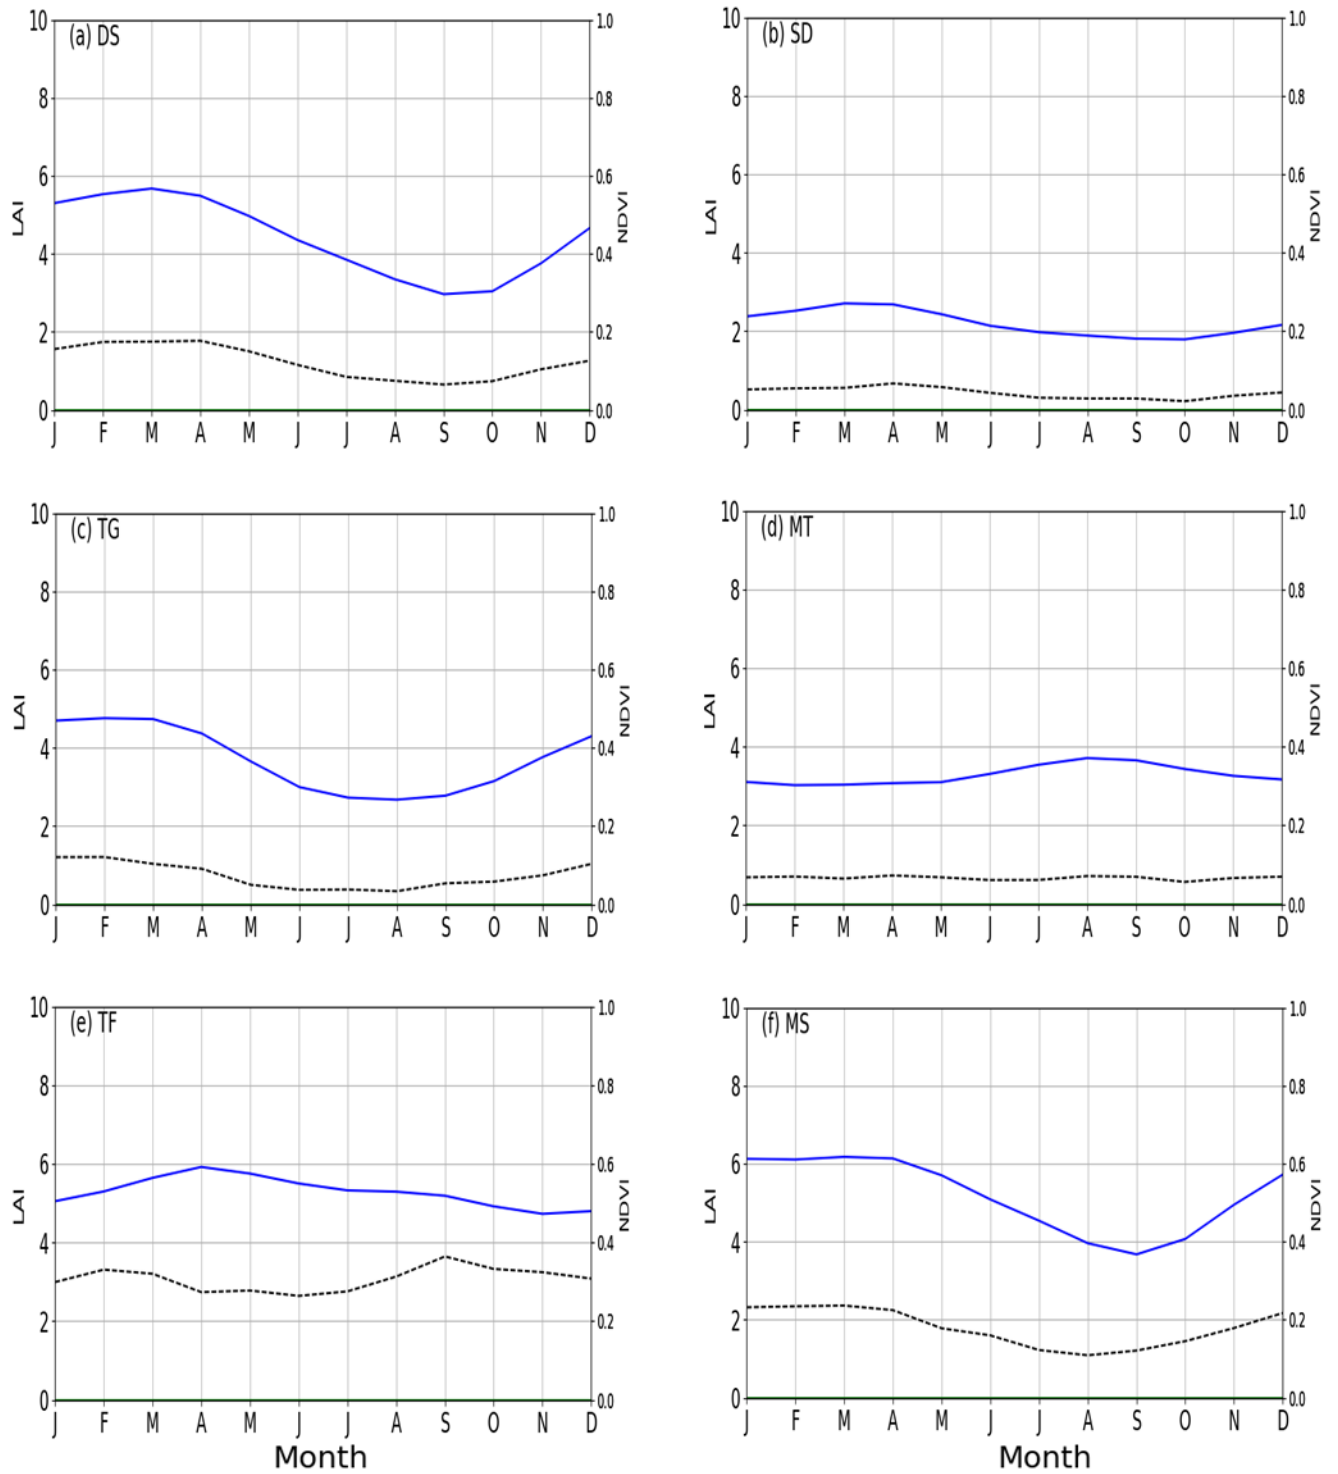

119

120 Figure S7. Annual cycle of observed LAI and NDVI across six biomes over southern Africa  
 121 for the period 1982 – 2011.

122

123
